# Supplementary material for: Dendrimer like star polymer based on β-cyclodextrin with ABC type miktoarms
Source: Royal Society of Chemistry journal article supplement (doi:10.1039/c6ra09660c), 2016-01-01
Supplement: c6ra09660c1.pdf [file c6ra09660c1.pdf]

## Electronic Supporting Information

### Dendrimer like star polymer based on $\beta$ -cyclodextrin with ABC type miktoarms

Kranthikumar Tungala,<sup>a</sup> Pubali Adhikary,<sup>a</sup> Venkanna Azmeera,<sup>a</sup> Krishna Kumar,<sup>b</sup> K. Ramesh,<sup>c</sup>  
S. Krishnamoorthi<sup>a\*</sup>

<sup>a</sup>Department of Chemistry, Centre of Advanced Studies, Institute of Science, Banaras Hindu University, Varanasi 221005, INDIA

<sup>b</sup>Department of Applied Science, Madan Mohan Malaviya University of Technology, Gorakhpur-273010, INDIA

<sup>c</sup>School of Biomedical Engineering, Institute of Technology, Banaras Hindu University, Varanasi 221005, INDIA

\*Corresponding author. Email address: dr.skmoorthi@gmail.com; Tel.: +91 5426702484.

A dendrimer like star polymer based on  $\beta$ -cyclodextrin, in which the primary alcoholic arms of  $\beta$ -cyclodextrin core linked to ABC type miktoarm star polymers, was synthesized through the combination of ATRP, ROP, RAFT polymerization and click reaction methodologies.

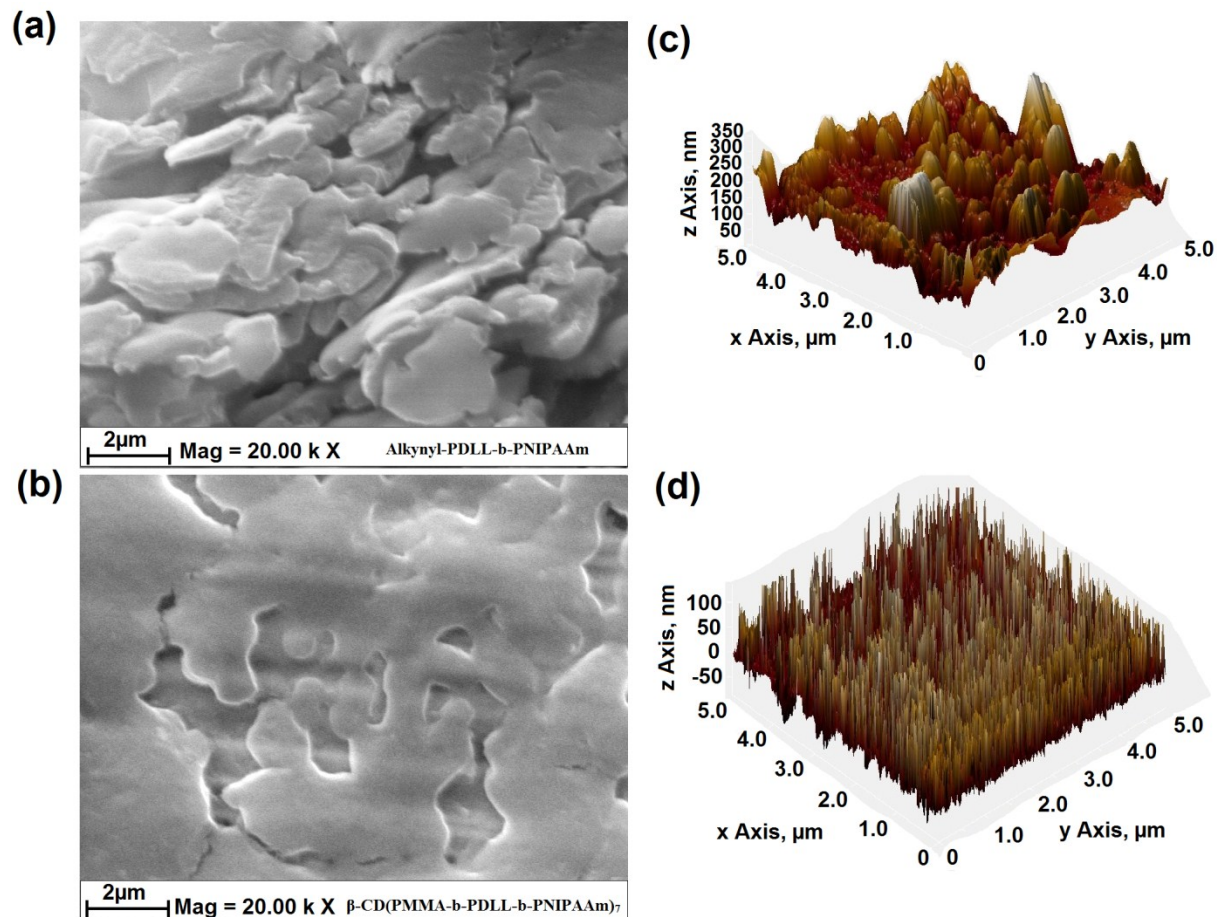

**Figure S1.** Scanning electron micrographs of (a) Alkynyl-PDLL-b-PNIPAAm and (b)  $\beta$ -CD(PMMA-b-PDLL-b-PNIPAAm)<sub>7</sub>, and atomic force microscopic images of (c) Alkynyl-PDLL-b-PNIPAAm and (d)  $\beta$ -CD(PMMA-b-PDLL-b-PNIPAAm)<sub>7</sub>.

Fluorescence spectroscopy was used, with pyrene as the probe, in order to determine the critical micellar concentration (cmc) of both polymers i.e., Alkynyl-PDLL-b-PNIPAAm and  $\beta$ -CD(PMMA-b-PDLL-b-PNIPAAm)<sub>7</sub> in water. **Figure S2(a)** and **S2(b)** show the excitation fluorescence spectra, from 300 to 360 nm, of pyrene ( $6 \times 10^{-7}$  M) at different concentrations of Alkynyl-PDLL-b-PNIPAAm and  $\beta$ -CD(PMMA-b-PDLL-b-PNIPAAm)<sub>7</sub> respectively recorded at an emission wavelength of 394 nm. **Figure S2(c)** and **S2(d)** show the corresponding plots of the ratio of the peak intensities of the excitation spectra of pyrene at 337.07 nm ( $I_3$ ) and 333.07 nm

( $I_1$ ) vs concentration of the amphiphilic block copolymer and star polymer concentration (mg/mL) respectively, in water. The cmc value was taken from the intercepting point of two straight lines connecting the resultant points. The observed cmc of Alkynyl-PDLL-b-PNIPAAm and  $\beta$ -CD(PMMA-b-PDLL-b-PNIPAAm)<sub>7</sub> were 0.0082 and 0.0573 mg/mL, respectively. The lower cmc value of Alkynyl-PDLL-b-PNIPAAm compared with that of  $\beta$ -CD(PMMA-b-PDLL-b-PNIPAAm)<sub>7</sub> was due to the smaller hydrophobic block segment in the amphiphilic block copolymer.

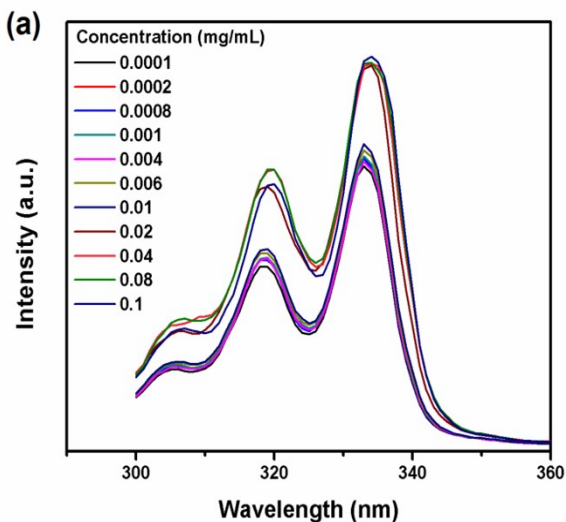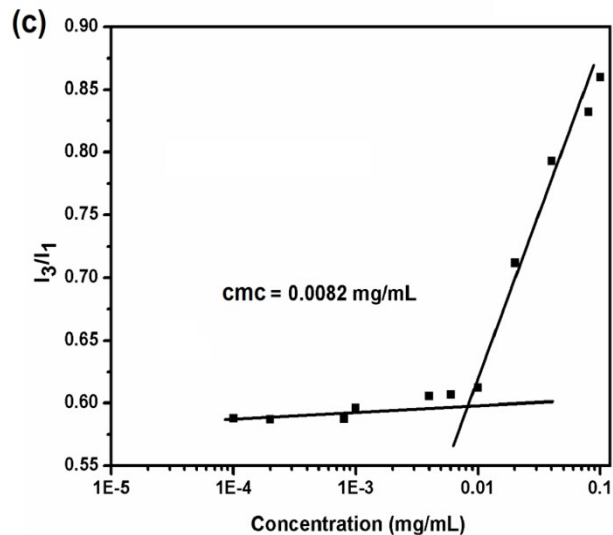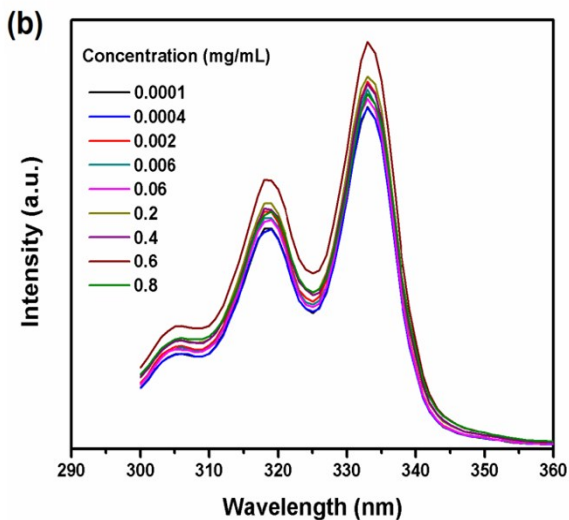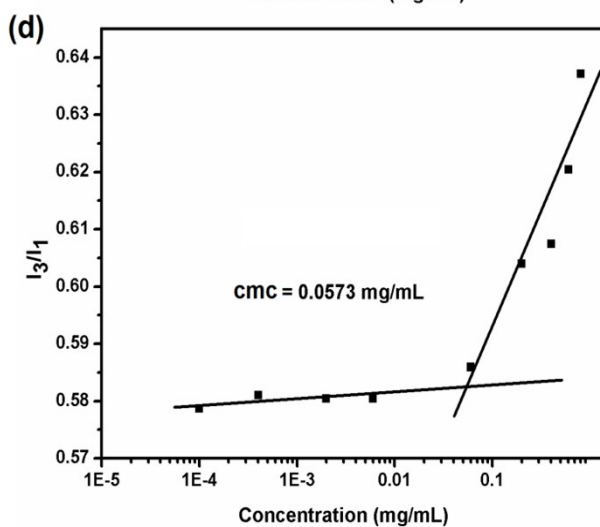

**Figure S2.** Fluorescence excitation spectra ( $\lambda_{em} = 394$  nm) of pyrene ( $6 \times 10^{-7}$  M) in the presence of progressively higher concentration (C) (mg/mL) of (a) amphiphilic block copolymer, Alkynyl-PDLL-b-PNIPAAm and (b) star polymer,  $\beta$ -CD(PMMA-b-PDLL-b-PNIPAAm)<sub>7</sub>, and semilogarithmic plot of the fluorescence excitation intensity ratio ( $I_{337.07}/I_{333.07}$ ) of pyrene ( $6 \times 10^{-7}$  M) monitored at  $\lambda_{em} = 394$  nm vs the concentration of (c) Alkynyl-PDLL-b-PNIPAAm and (d)  $\beta$ -CD(PMMA-b-PDLL-b-PNIPAAm)<sub>7</sub> in water.
